# Supplementary material
Source: PubMed Central journal article supplement (PMC6031454)
Supplement: NIHMS958939-supplement-1.pdf [file NIHMS958939-supplement-1.pdf]

**A**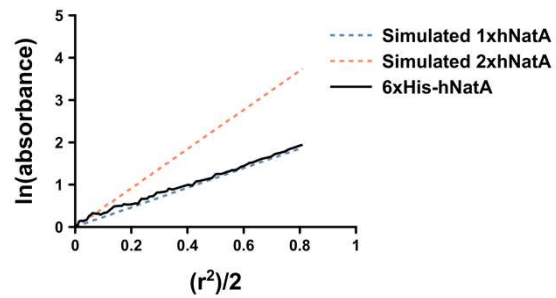**B**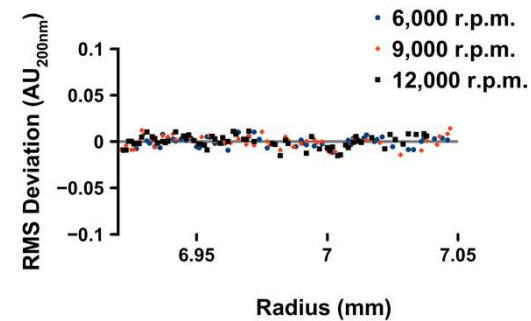

**Figure S1, Related to Figure 1. Sedimentation Equilibrium of human NatA.**

(A) Log plot of sedimentation equilibrium experiments a sedimentation experiment showing theoretical monomer (blue) and theoretical dimer (red) slopes of hNatA ( $OD_{A280}=0.8$ ) at 12,000 rpm (black).

(B) The corresponding residuals for all three speeds associated with A.

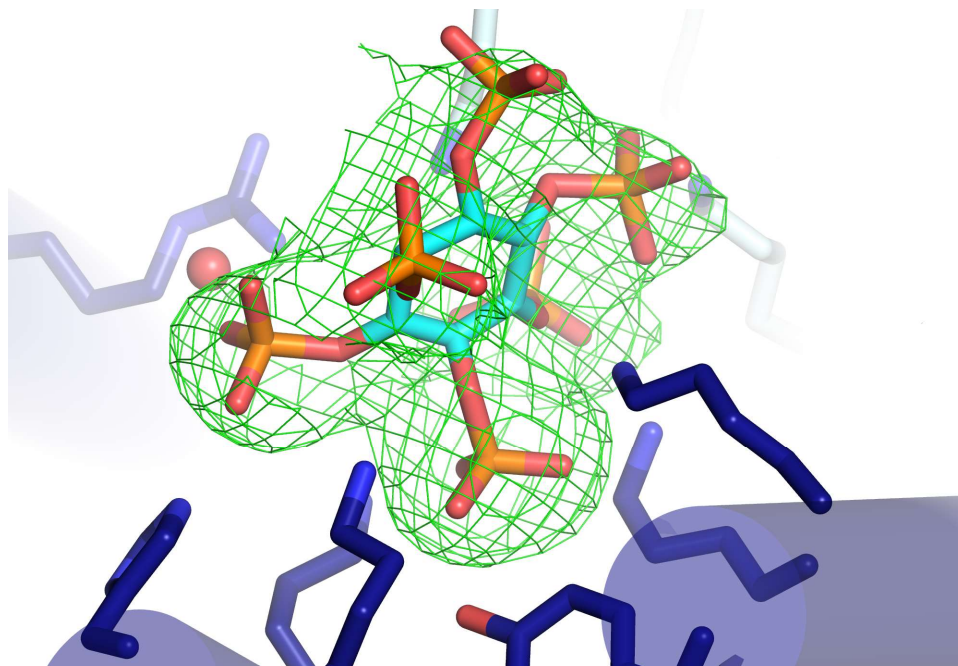

**Figure S2, Related to Figure 1. IP<sub>6</sub> F<sub>o</sub>-F<sub>c</sub> Map.**  
Human NatA-bound IP<sub>6</sub> density contoured to 3.5σ (shown in green).



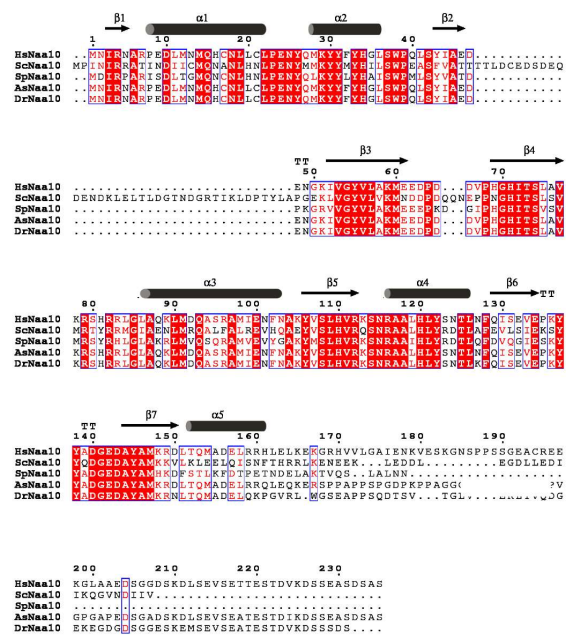

**Figure S4, Related to Figure 1. Alignment of Naa10 Homologues.** Sequence alignment of Naa10 homologues from *H. sapiens* (Hs); *S. cerevisiae* (Sc); *S. pombe* (Sp); *A. sinensis* (As); and *D. rerio* subunit b (Dr). The dashed line indicates the truncation construct used for all experimental studies.

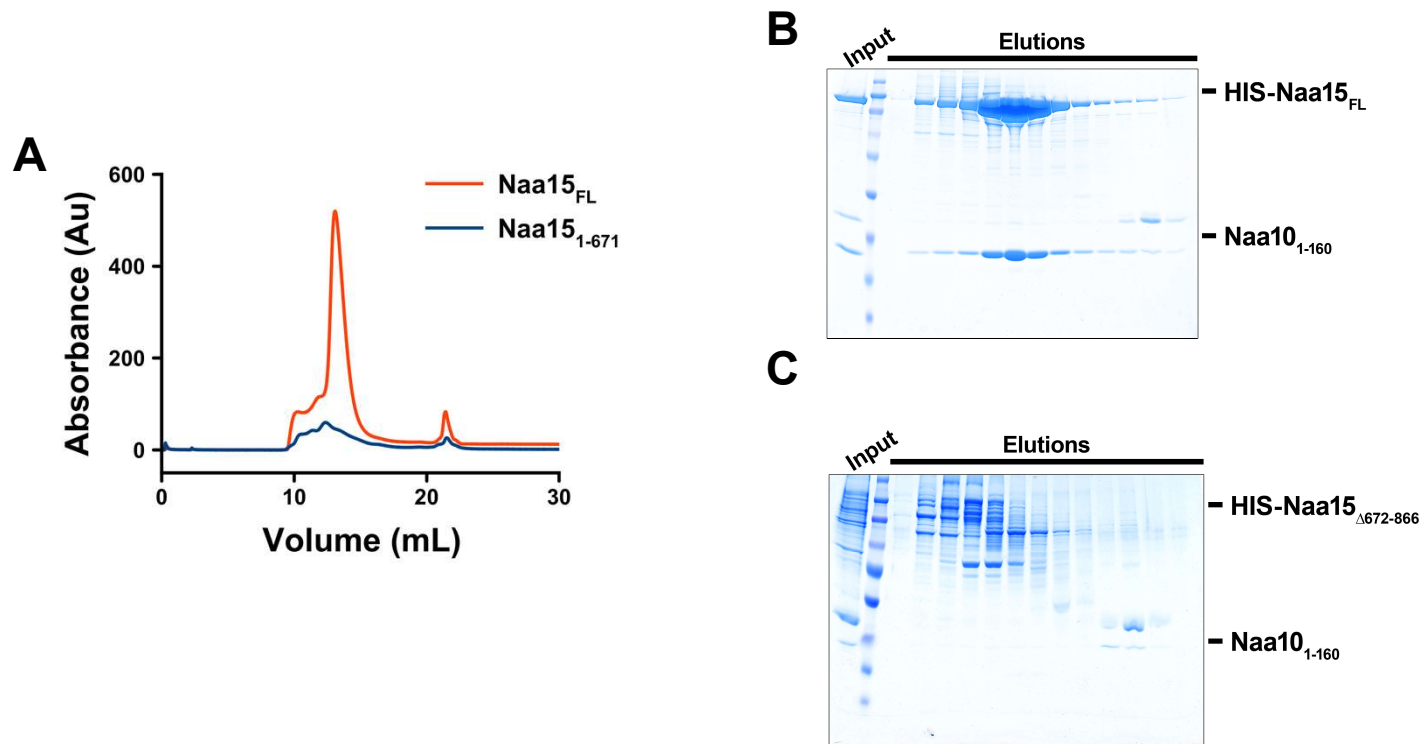

**Figure S5, Related to Figure 1. C-terminal Truncation of Naa15 Abrogates NatA Binary Complex Formation.**

(A) S200 gel filtration chromatogram.

(B) Corresponding SDS-PAGE gel to the trace of HIS-Naa15<sub>FL</sub>/Naa10<sub>1-160</sub> complex (red) for A.

(C) Corresponding SDS-PAGE gel to the trace of HIS-Naa15<sub>Δ672-866</sub>/Naa10<sub>1-160</sub> complex (blue) for A.
